# Supplementary material for: Effectiveness of the Pfizer-BioNTech and Oxford-AstraZeneca vaccines on covid-19 related symptoms, hospital admissions, and mortality in older adults in England: test negative case-control study
Source: PubMed Central journal article supplement — BMJ. 2021 May 13;373:n1088. doi: 10.1136/bmj.n1088 (PMC8116636; doi:10.1136/bmj.n1088), 2021-05-13

| Supplementary table 1: characteristics of individuals in linked and unlinked tests |         |       |          |       |
|------------------------------------------------------------------------------------|---------|-------|----------|-------|
|                                                                                    | Linked  |       | Unlinked |       |
|                                                                                    | n       | %     | n        | %     |
| <b>Overall Percentage of Linked and Unlinked Tests</b>                             | 156,930 | 89.8% | 17,801   | 10.2% |
| <i>Characteristics of Dataset</i>                                                  |         |       |          |       |
| <b>Test Result</b>                                                                 |         |       |          |       |
| positive results                                                                   | 44,590  | 28.4% | 5,514    | 31.0% |
| negative results                                                                   | 112,340 | 71.6% | 12,287   | 69.0% |
| <b>Gender</b>                                                                      |         |       |          |       |
| female                                                                             | 87,066  | 55.5% | 10,521   | 59.1% |
| male                                                                               | 69,864  | 44.5% | 7,280    | 40.9% |
| <b>Ethnicity</b>                                                                   |         |       |          |       |
| African                                                                            | 684     | 0.4%  | 249      | 1.4%  |
| Another Asian background                                                           | 1,348   | 0.9%  | 311      | 1.7%  |
| Another Black background                                                           | 114     | 0.1%  | 34       | 0.2%  |
| Another ethnic background                                                          | 798     | 0.5%  | 195      | 1.1%  |
| Arab                                                                               | 286     | 0.2%  | 103      | 0.6%  |
| Bangladeshi                                                                        | 648     | 0.4%  | 128      | 0.7%  |
| Caribbean                                                                          | 1,062   | 0.7%  | 206      | 1.2%  |
| Chinese                                                                            | 313     | 0.2%  | 48       | 0.3%  |
| Indian                                                                             | 5,045   | 3.2%  | 794      | 4.5%  |
| Mixed or multiple ethnic groups                                                    | 638     | 0.4%  | 124      | 0.7%  |
| Pakistani                                                                          | 2,497   | 1.6%  | 523      | 2.9%  |
| Prefer not to say                                                                  | 7,236   | 4.6%  | 1,606    | 9.0%  |
| White                                                                              | 136,261 | 86.8% | 13,480   | 75.7% |
| <b>New variant status of positive tests</b>                                        |         |       |          |       |
| Non-SGTF                                                                           | 5,348   | 12.0% | 590      | 10.7% |
| SGTF                                                                               | 16,780  | 37.6% | 2,085    | 37.8% |
| Not known (not one of labs using TaqPath assay)                                    | 22,462  | 50.4% | 2,839    | 51.5% |
| <b>Previous positive (Ab or PCR) prior to 8 Dec 2020 *</b>                         |         |       |          |       |
| No                                                                                 | 155,661 | 99.2% | 17,678   | 99.3% |
| Yes                                                                                | 1,269   | 0.8%  | 123      | 0.7%  |
| <b>Age Group</b>                                                                   |         |       |          |       |
| 70-74                                                                              | 77,363  | 49.3% | 7,479    | 42.0% |
| 75-79                                                                              | 40,658  | 25.9% | 4,475    | 25.1% |
| 80-84                                                                              | 20,555  | 13.1% | 2,736    | 15.4% |
| 85-89                                                                              | 11,248  | 7.2%  | 1,663    | 9.3%  |
| >=90                                                                               | 7,106   | 4.5%  | 1,448    | 8.1%  |
| <b>NHS Region</b>                                                                  |         |       |          |       |
| East of England                                                                    | 21,757  | 13.9% | 2,317    | 13.0% |
| London                                                                             | 21,749  | 13.9% | 3,357    | 18.9% |
| Midlands                                                                           | 29,495  | 18.8% | 3,220    | 18.1% |
| North East                                                                         | 20,264  | 12.9% | 2,141    | 12.0% |
| North West                                                                         | 20,686  | 13.2% | 2,285    | 12.8% |
| South East                                                                         | 28,806  | 18.4% | 3,113    | 17.5% |
| South West                                                                         | 14,173  | 9.0%  | 1,368    | 7.7%  |
| SGTF= S-gene target failure                                                        |         |       |          |       |

Supplementary table 2: Adjusted odds ratios for confirmed case by interval after vaccination for BNT162b2, age  $\geq 70$  years since 8th December

| Interval<br>(days) | Pfizer BioNTech |        |                  |                  |
|--------------------|-----------------|--------|------------------|------------------|
|                    | controls        | cases  | aOR (95% CI)     | aOR vs day 4-9   |
| unvacc             | 89,377          | 37,320 | base             |                  |
| d1:0-3             | 1624            | 817    | 1.18 (1.08-1.29) |                  |
| d1:4-6             | 1414            | 673    | 1.12 (1.02-1.24) |                  |
| d1:7-9             | 1387            | 748    | 1.23 (1.12-1.36) |                  |
| d1:10-13           | 1905            | 807    | 0.99 (0.91-1.08) | 0.84 (0.76-0.94) |
| d1:14-20           | 2474            | 811    | 0.84 (0.77-0.91) | 0.71 (0.64-0.79) |
| d1:21-27           | 1669            | 367    | 0.61 (0.54-0.69) | 0.52 (0.46-0.60) |
| d1:28-34           | 1064            | 186    | 0.50 (0.42-0.59) | 0.42 (0.35-0.50) |
| d1:35-41           | 534             | 105    | 0.57 (0.46-0.71) | 0.49 (0.39-0.61) |
| d1:42+             | 460             | 65     | 0.44 (0.33-0.57) | 0.37 (0.28-0.49) |
| d2:0-3             | 125             | 48     | 0.64 (0.46-0.90) | 0.55 (0.39-0.77) |
| d2:4-6             | 88              | 34     | 0.67 (0.45-1.00) | 0.57 (0.38-0.86) |
| d2:7-13            | 214             | 31     | 0.26 (0.18-0.39) | 0.22 (0.15-0.33) |
| d2:14+             | 672             | 42     | 0.17 (0.12-0.23) | 0.14 (0.10-0.20) |

Supplementary table 3: Adjusted odds ratios for confirmed case by interval after vaccination for BNT162b2, vaccinations administered prior to 4th January 2021, age  $\geq 80$  years, including previously positive cases

| Interval<br>(days) | Pfizer BioNTech |        |                  |                  |
|--------------------|-----------------|--------|------------------|------------------|
|                    | controls        | cases  | aOR (95% CI)     | aOR vs day 4-9   |
| unvacc             | 90,193          | 37,389 | 1.18 (1.08-1.28) |                  |
| d1:0-3             | 1666            | 818    | 1.12 (1.02-1.23) |                  |
| d1:4-6             | 1428            | 674    | 1.23 (1.12-1.35) |                  |
| d1:7-9             | 1404            | 748    | 0.99 (0.90-1.08) |                  |
| d1:10-13           | 1922            | 807    | 0.84 (0.77-0.91) | 0.84 (0.75-0.94) |
| d1:14-20           | 2507            | 813    | 0.61 (0.54-0.69) | 0.71 (0.64-0.79) |
| d1:21-27           | 1693            | 367    | 0.49 (0.42-0.58) | 0.52 (0.46-0.60) |
| d1:28-34           | 1088            | 186    | 0.58 (0.46-0.72) | 0.42 (0.35-0.50) |
| d1:35-41           | 545             | 106    | 0.44 (0.34-0.58) | 0.49 (0.39-0.62) |
| d1:42+             | 474             | 66     | 0.64 (0.46-0.90) | 0.38 (0.29-0.50) |
| d2:0-3             | 126             | 48     | 0.67 (0.45-1.00) | 0.55 (0.39-0.77) |
| d2:4-6             | 88              | 34     | 0.26 (0.18-0.38) | 0.57 (0.38-0.86) |
| d2:7-13            | 217             | 31     | 0.17 (0.12-0.23) | 0.22 (0.15-0.33) |
| d2:14+             | 679             | 42     | 0.17 (0.12-0.23) | 0.14 (0.10-0.20) |

Supplementary table 4: Adjusted odds ratios for confirmed case by interval after vaccination for ChAdOx1, vaccinations administered since 4th January 2021, age  $\geq 70$  years

| Interval<br>(days) | Astrazeneca |        |                  |
|--------------------|-------------|--------|------------------|
|                    | controls    | cases  | aOR (95% CI)     |
| unvacc             | 37,027      | 15,322 | base             |
| d1:0-3             | 2404        | 570    | 0.64 (0.58-0.71) |
| d1:4-6             | 1163        | 407    | 0.96 (0.85-1.09) |
| d1:7-9             | 1210        | 439    | 1.02 (0.90-1.16) |
| d1:10-13           | 1256        | 443    | 0.99 (0.87-1.12) |
| d1:14-20           | 1374        | 396    | 0.76 (0.66-0.87) |
| d1:21-27           | 639         | 148    | 0.54 (0.44-0.67) |
| d1:28-34           | 185         | 39     | 0.39 (0.27-0.57) |
| d1:35+             | 35          | 5      | 0.26 (0.10-0.68) |

Supplementary table 5: Adjusted odds ratios for confirmed case by interval after vaccination for BNT162b2 by S-gene target failure status, age  $\geq 70$  years since 8th December

| Interval<br>(days) | SGTF     |       |                  |                  | No SGTF  |       |                  |                  |
|--------------------|----------|-------|------------------|------------------|----------|-------|------------------|------------------|
|                    | controls | cases | aOR (95% CI)     | aOR vs day 4-9   | controls | cases | aOR (95% CI)     | aOR vs day 4-9   |
| unvacc             | 8,080    | 2,742 | base             |                  | 8,080    | 1,199 | base             |                  |
| d1:0-3             | 134      | 53    | 1.36 (0.97-1.90) |                  | 134      | 18    | 0.92 (0.56-1.53) |                  |
| d1:4-6             | 120      | 46    | 1.30 (0.91-1.86) |                  | 120      | 24    | 1.23 (0.79-1.94) |                  |
| d1:7-9             | 125      | 79    | 1.55 (1.15-2.09) |                  | 125      | 23    | 1.05 (0.66-1.67) |                  |
| d1:10-13           | 181      | 88    | 1.13 (0.86-1.47) | 0.78 (0.55-1.10) | 181      | 37    | 1.24 (0.85-1.81) | 1.09 (0.67-1.77) |
| d1:14-20           | 255      | 112   | 1.00 (0.79-1.26) | 0.69 (0.50-0.96) | 255      | 45    | 1.19 (0.85-1.66) | 1.04 (0.66-1.66) |
| d1:21-27           | 180      | 61    | 0.74 (0.54-1.00) | 0.51 (0.35-0.75) | 180      | 11    | 0.69 (0.37-1.31) | 0.61 (0.30-1.25) |
| d1:28-34           | 172      | 32    | 0.40 (0.27-0.60) | 0.28 (0.18-0.44) | 172      | 3     | 0.24 (0.07-0.78) | 0.21 (0.06-0.72) |
| d1:35-41           | 158      | 38    | 0.56 (0.38-0.83) | 0.39 (0.25-0.61) | 158      | 1     | 0.13 (0.02-0.94) | 0.11 (0.01-0.85) |
| d1:42+             | 247      | 33    | 0.32 (0.21-0.49) | 0.22 (0.14-0.36) | 247      | 3     | 0.28 (0.07-1.03) | 0.24 (0.06-0.95) |
| d2:0-3             | 68       | 16    | 0.50 (0.28-0.87) | 0.34 (0.19-0.63) | 68       | 3     | 0.41 (0.13-1.32) | 0.36 (0.11-1.21) |
| d2:4-6             | 51       | 10    | 0.39 (0.20-0.79) | 0.27 (0.13-0.56) | 51       | 4     | 0.77 (0.27-2.16) | 0.67 (0.23-2.00) |
| d2:7-13            | 126      | 12    | 0.19 (0.10-0.34) | 0.13 (0.07-0.25) | 126      | 0     |                  |                  |
| d2:14+             | 395      | 16    | 0.10 (0.06-0.16) | 0.07 (0.04-0.12) | 395      | 0     |                  |                  |

SGTF = S-gene target failure

Supplementary fig 1: Cases and controls by week and vaccination status

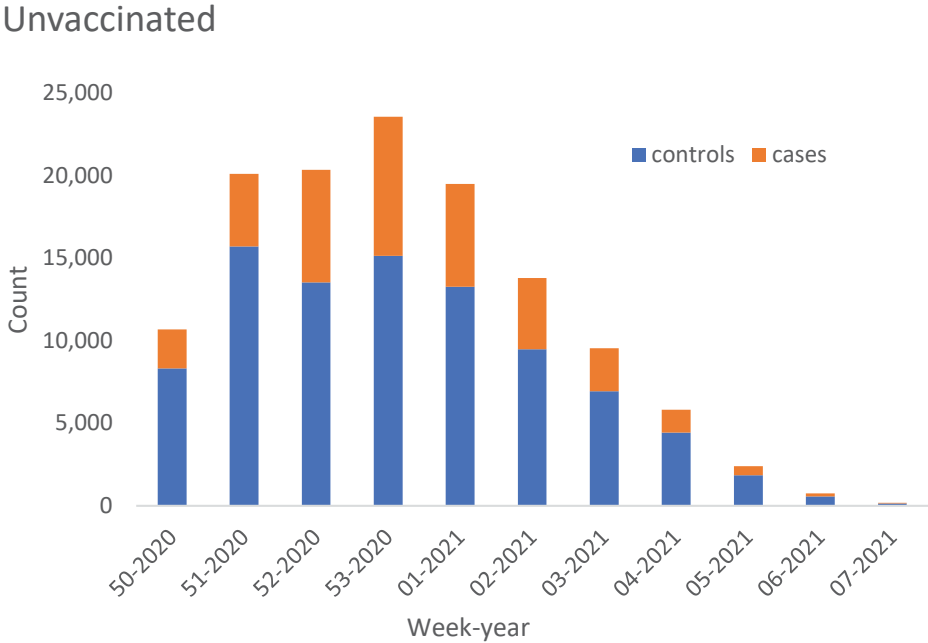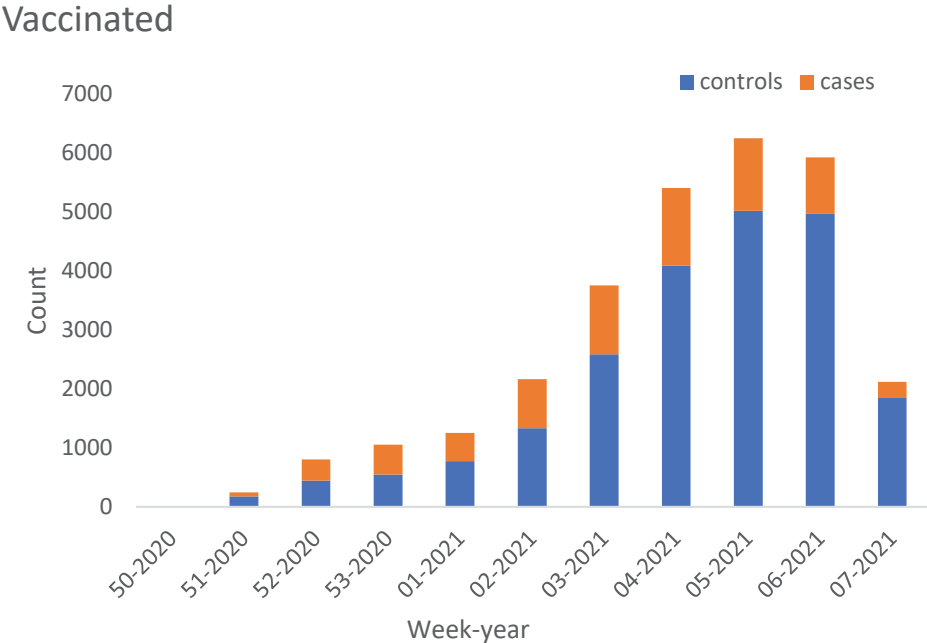

Supplementary fig 2: Adjusted odds ratios for confirmed case by interval after vaccination for BNT162b2, age  $\geq 70$  years since 8th December

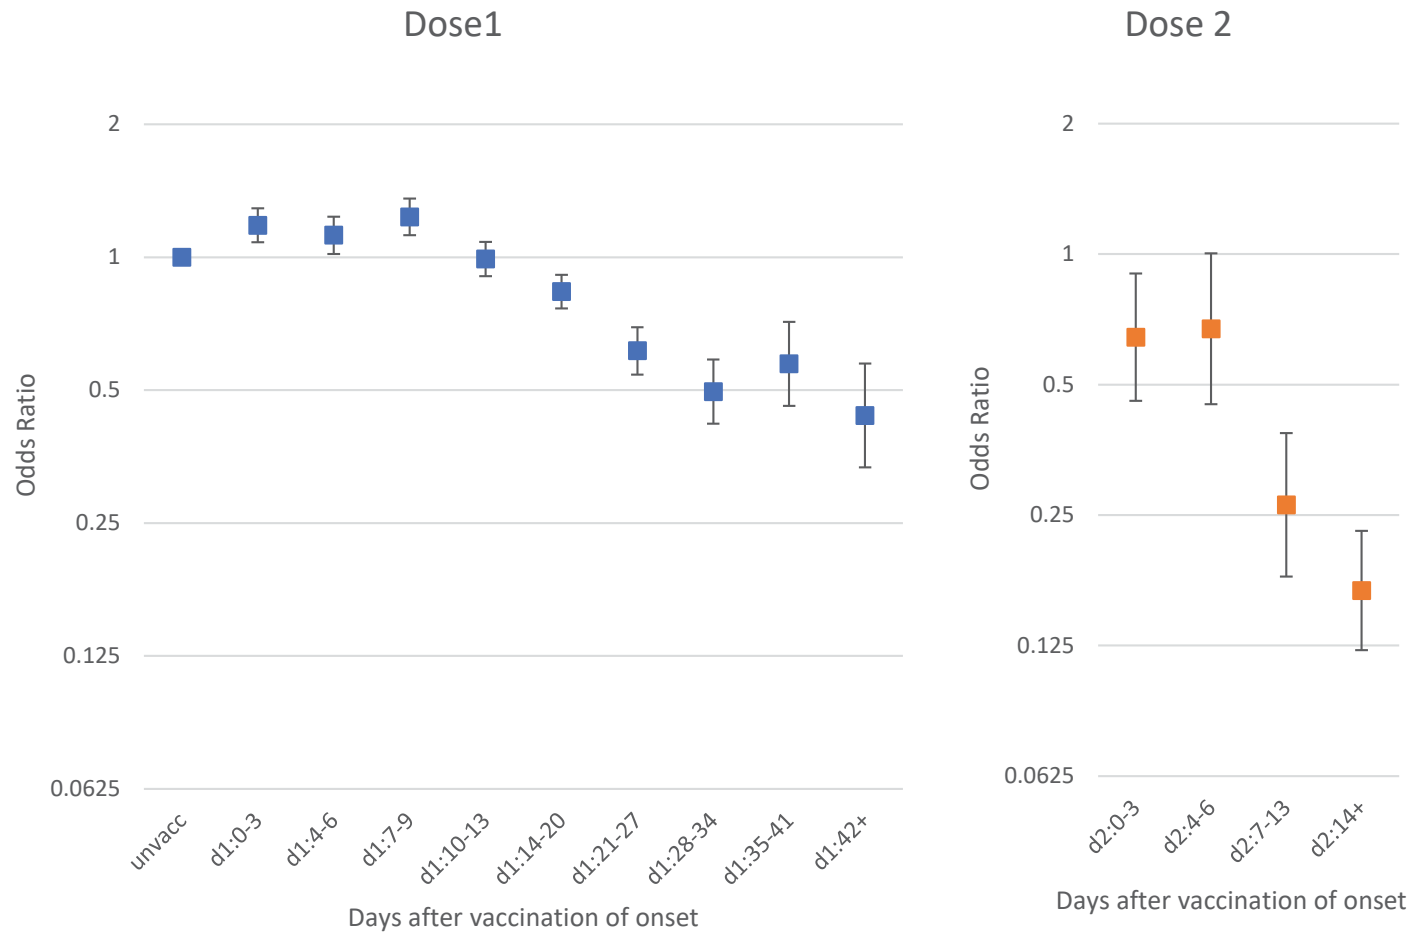

Supplementary fig 3: Kaplan-Meier curves for hospitalisations by vaccination status for BNT162b2 and ChAdOx1

(a) BNT162b2

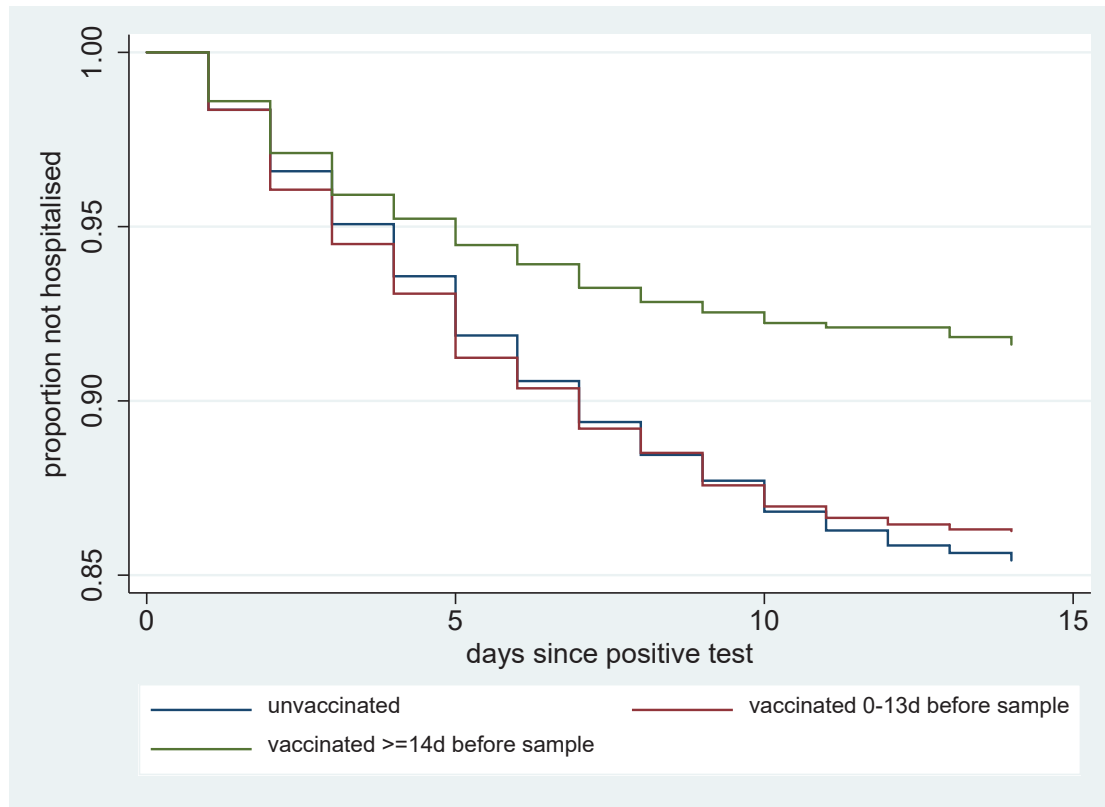

(b) ChAdOx1

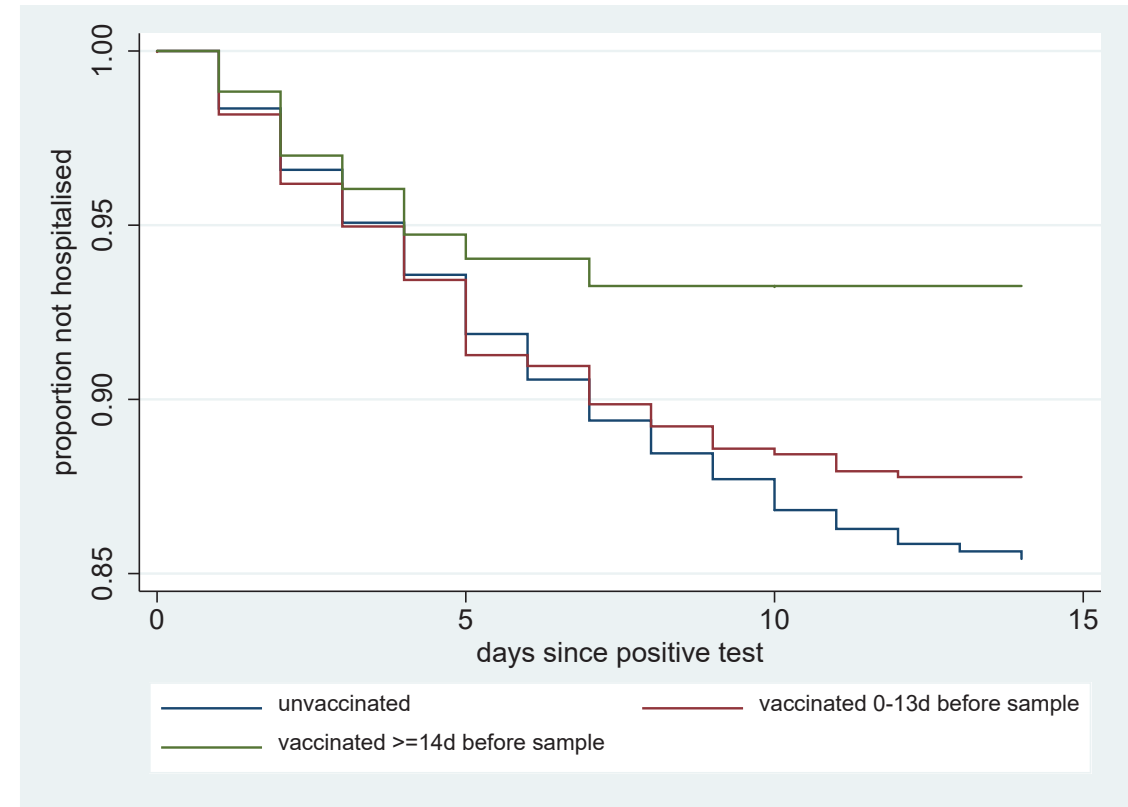

- (a) BNT162b2 Adjusting for age, care home, period and gender the hazard ratios compared to unvaccinated were 0.98 (95% CI 0.86-1.11) for days 0-13 and 0.56 (0.47-0.67) for days 14+.
- (b) ChAdOx1 Adjusting for age, care home, period and gender the hazard ratios compared to unvaccinated were 0.97 (95% CI 0.76-1.23) for days 0-13 and 0.58 (0.36-0.94) for days 14+.



Supplementary fig 4: control analysis - Kaplan-Meier curves for hospitalisation among test negatives

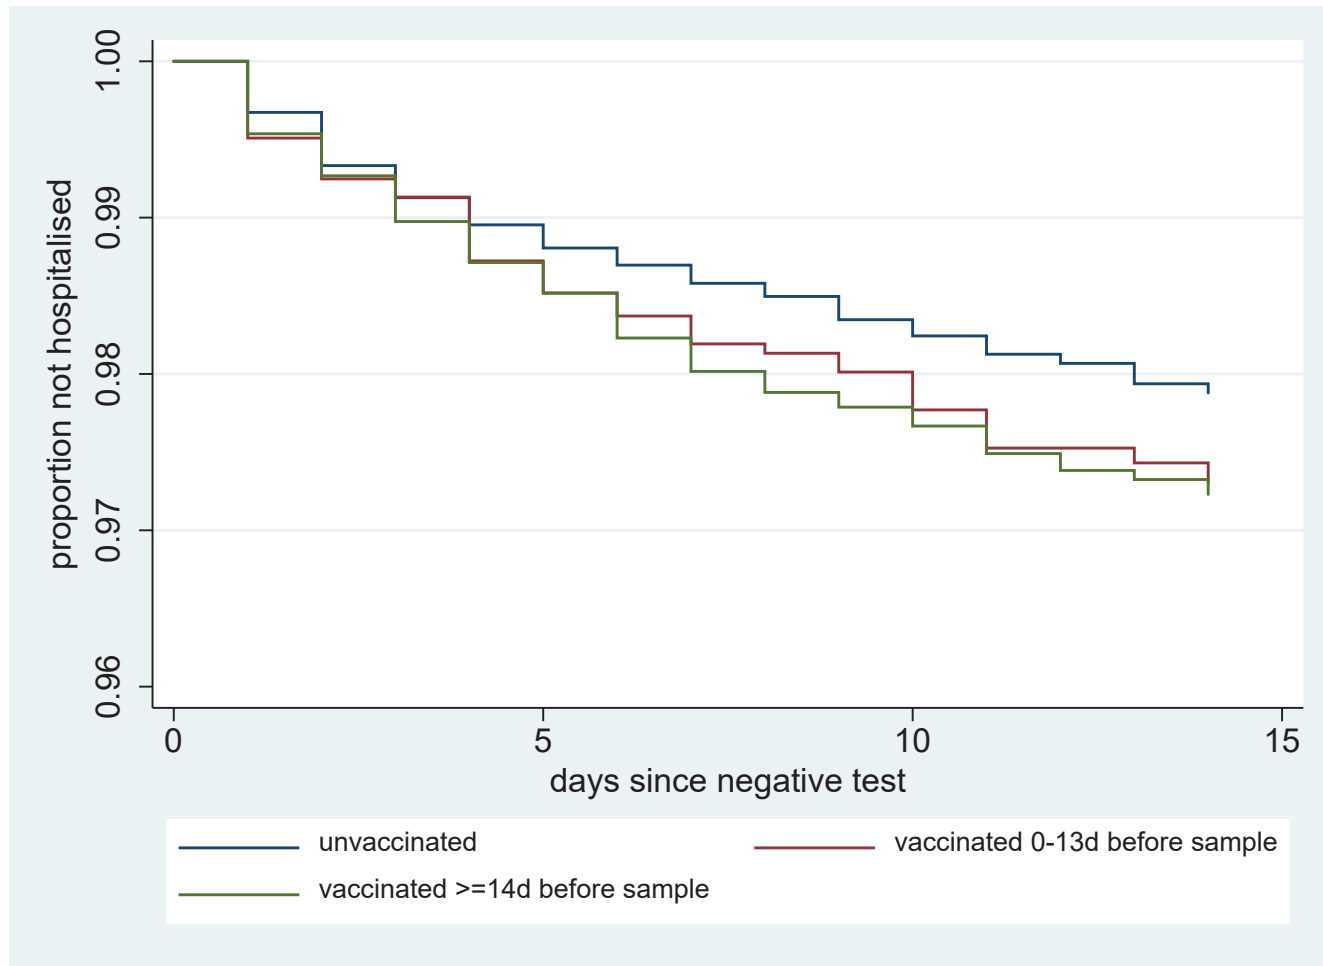

Adjusting for age, care home, period and gender the hazard ratios compared to unvaccinated were 1.24 (95% CI 0.98-1.56) for days 0-13 and 1.12 (0.89-1.41) for days 14+.

Supplementary fig 5: Kaplan-Meier curves for deaths by vaccination status for BNT162b2

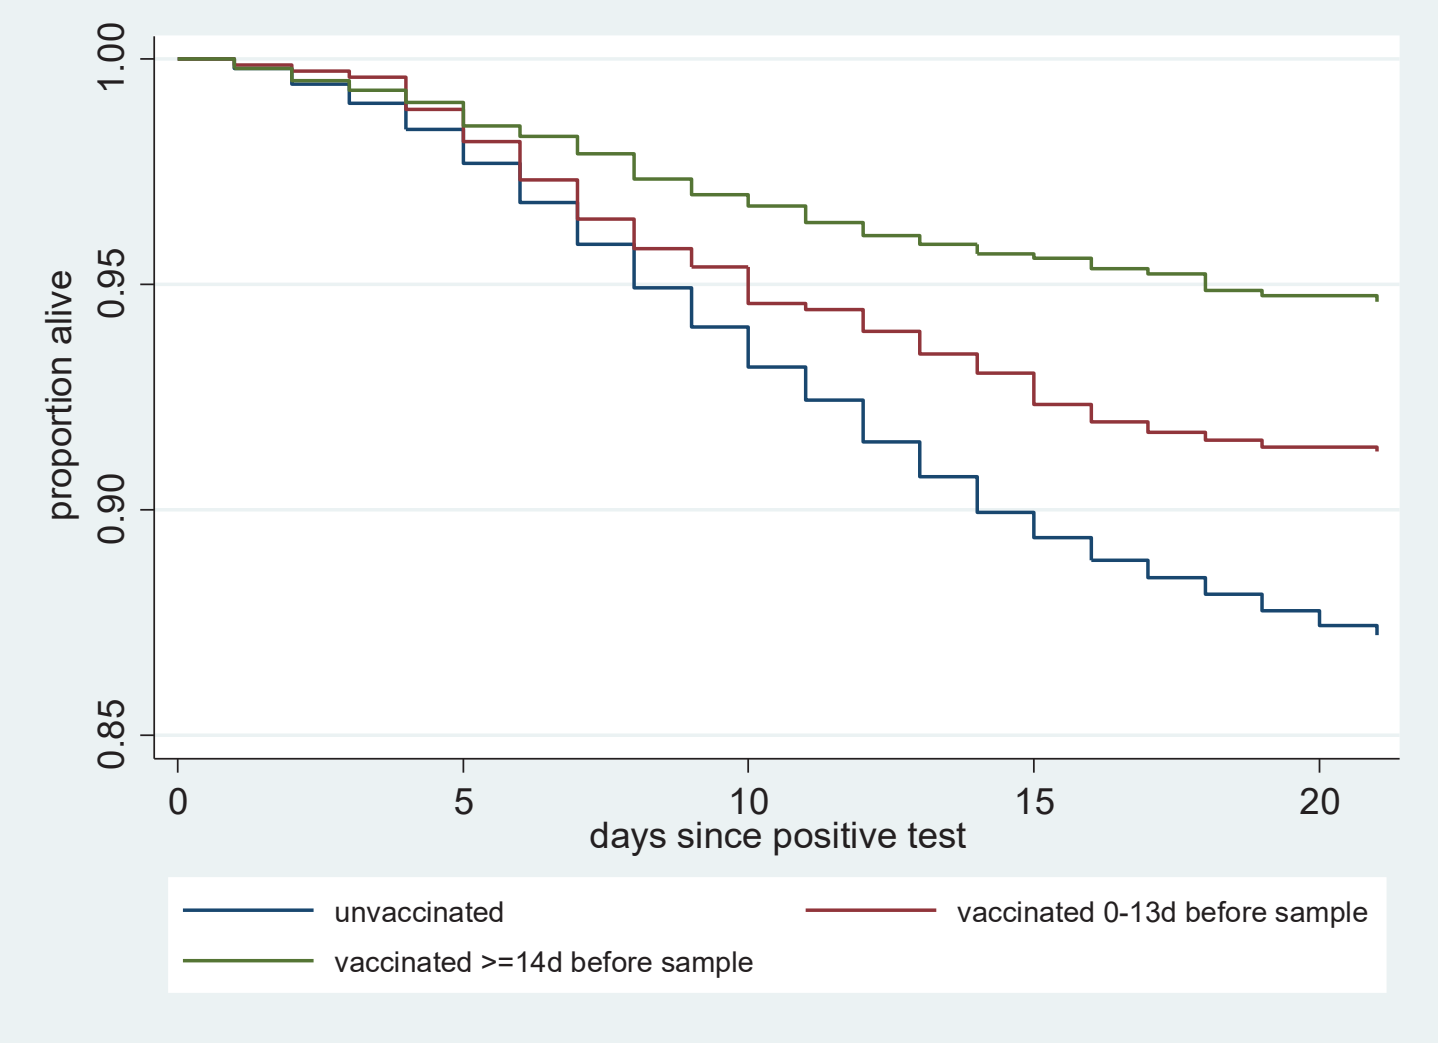

Adjusting for age, care home, period and gender the hazard ratios compared to unvaccinated were 0.74 (95% CI 0.62-0.90) for days 0-13 and 0.49 (0.38-0.63) for days 14+.

Supplementary fig 6: control analysis - Kaplan-Meier curves for deaths among test negatives BNT162b2

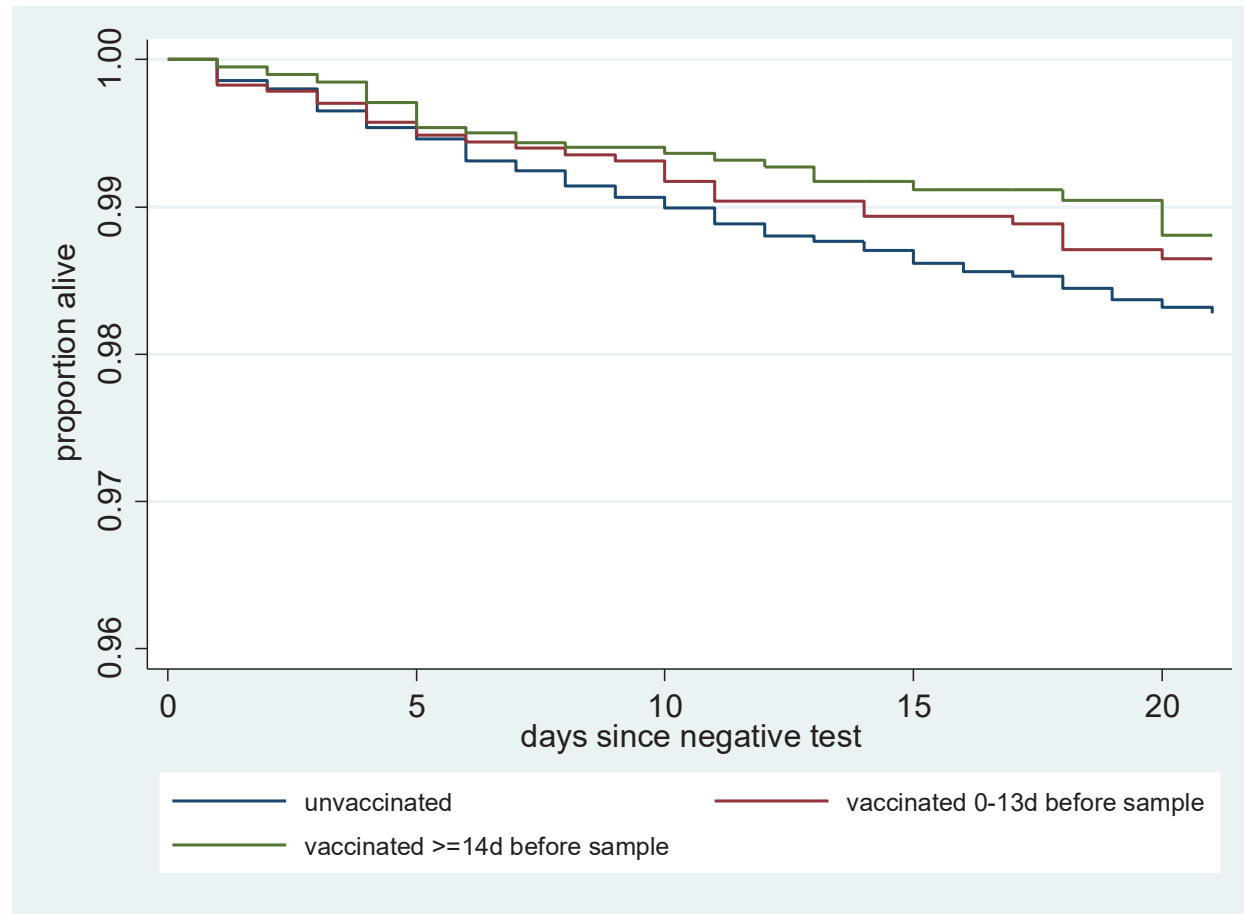

The Hazard ratios are 0.92 (0.62-1.35) and 0.81 (0.54-1.21) for intervals of 0-13 and 14+ from dose 1.

Supplementary fig 7 completeness of vaccination data by days after vaccination

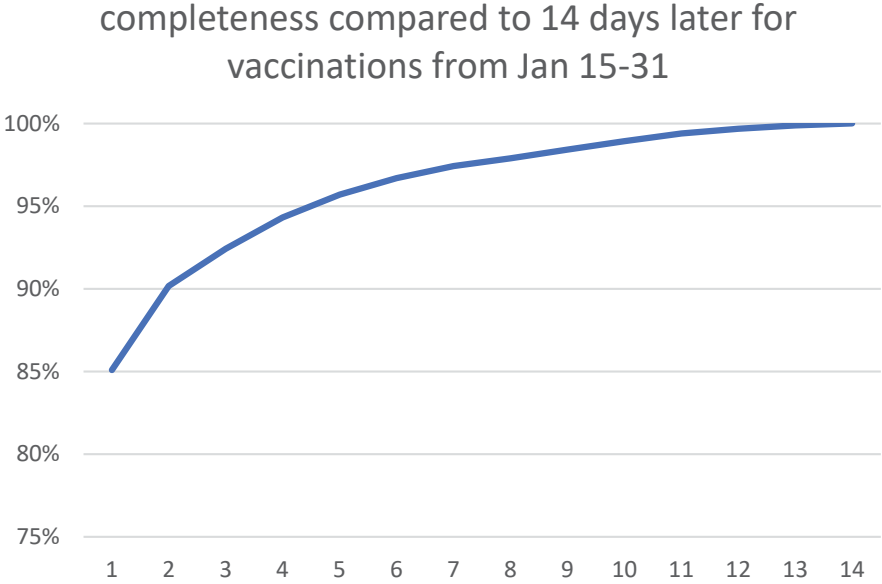

Supplement: lopj065133.ww.pdf [file lopj065133.ww.pdf]
